# Supplementary material for: Addressing the Challenges and Barriers to the Integration of Machine Learning into Clinical Practice: An Innovative Method to Hybrid Human–Machine Intelligence
Source: MDPI journal article supplement (doi:10.3390/s22218313), 2022-10-29
Supplement: s1 [file s1]

# Addressing the challenges and barriers to the integration of machine learning into clinical practice: An innovative method to hybrid human-machine intelligence

## Supplementary Materials

*Table S1, Descriptive statistics of the quantitative data*

|                           | mean         | std          | min        | 25%          | 50%          | 75%          | max         |
|---------------------------|--------------|--------------|------------|--------------|--------------|--------------|-------------|
| <b>ONSYRS</b>             | 6.497403e+00 | 6.363143     | 0.00       | 2.000000e+00 | 4.000000e+00 | 9.000000e+00 | 40.000      |
| <b>AGEATONSET</b>         | 3.011948e+01 | 9.259797     | 8.00       | 2.300000e+01 | 2.900000e+01 | 3.600000e+01 | 54.000      |
| <b>DIAGYRS</b>            | 3.567532e+00 | 4.745402     | 0.00       | 1.000000e+00 | 1.000000e+00 | 5.000000e+00 | 40.000      |
| <b>AGEATDIAGYRS</b>       | 3.304935e+01 | 9.513807     | 13.00      | 2.600000e+01 | 3.300000e+01 | 4.000000e+01 | 58.000      |
| <b>T2LESIONSCREENING</b>  | 4.965065e+01 | 36.846517    | 0.00       | 2.225000e+01 | 4.200000e+01 | 7.100000e+01 | 249.000     |
| <b>NormalBrainVolume</b>  | 1.580130e+06 | 96188.787187 | 1278789.06 | 1.518173e+06 | 1.586498e+06 | 1.649965e+06 | 1851174.430 |
| <b>T2VOLUMESCREENING</b>  | 9.861367e+00 | 11.662986    | 0.00       | 1.960500e+00 | 5.734500e+00 | 1.348200e+01 | 99.054      |
| <b>GADOSCREENING</b>      | 1.370130e+00 | 3.652584     | 0.00       | 0.000000e+00 | 0.000000e+00 | 1.000000e+00 | 38.000      |
| <b>GDVOLUMESCREENING</b>  | 1.822369e-01 | 0.509063     | 0.00       | 0.000000e+00 | 0.000000e+00 | 1.230000e-01 | 5.019       |
| <b>T1LESIONSCREENING</b>  | 2.725714e+01 | 27.619208    | 0.00       | 7.000000e+00 | 1.800000e+01 | 4.100000e+01 | 204.000     |
| <b>T1VOLUMESCREENING</b>  | 3.007651e+00 | 4.771851     | 0.00       | 3.157500e-01 | 1.125000e+00 | 3.732000e+00 | 39.201      |
| <b>RLPS1YP</b>            | 1.571429e+00 | 0.675189     | 1.00       | 1.000000e+00 | 1.000000e+00 | 2.000000e+00 | 5.000       |
| <b>EDSSSCREENING</b>      | 2.442857e+00 | 1.207629     | 0.00       | 1.500000e+00 | 2.000000e+00 | 3.500000e+00 | 5.500       |
| <b>BOWLBLDRSCREENING</b>  | 4.415584e-01 | 0.642927     | 0.00       | 0.000000e+00 | 0.000000e+00 | 1.000000e+00 | 3.000       |
| <b>BRAINSTMSCREENING</b>  | 5.818182e-01 | 0.766110     | 0.00       | 0.000000e+00 | 0.000000e+00 | 1.000000e+00 | 4.000       |
| <b>CEREBELRSSCREENING</b> | 1.022078e+00 | 0.976062     | 0.00       | 0.000000e+00 | 1.000000e+00 | 2.000000e+00 | 4.000       |
| <b>CEREBRALSCREENING</b>  | 4.324675e-01 | 0.673662     | 0.00       | 0.000000e+00 | 0.000000e+00 | 1.000000e+00 | 2.000       |
| <b>DISTWALKSCREENING</b>  | 4.861039e+02 | 53.137108    | 150.00     | 5.000000e+02 | 5.000000e+02 | 5.000000e+02 | 500.000     |
| <b>PYRAMIDLSCREENING</b>  | 1.579221e+00 | 1.031158     | 0.00       | 1.000000e+00 | 1.000000e+00 | 2.000000e+00 | 5.000       |
| <b>SENSORYSCREENING</b>   | 8.675325e-01 | 0.975972     | 0.00       | 0.000000e+00 | 1.000000e+00 | 2.000000e+00 | 4.000       |
| <b>VISUALSCREENING</b>    | 5.948052e-01 | 0.859113     | 0.00       | 0.000000e+00 | 0.000000e+00 | 1.000000e+00 | 4.000       |

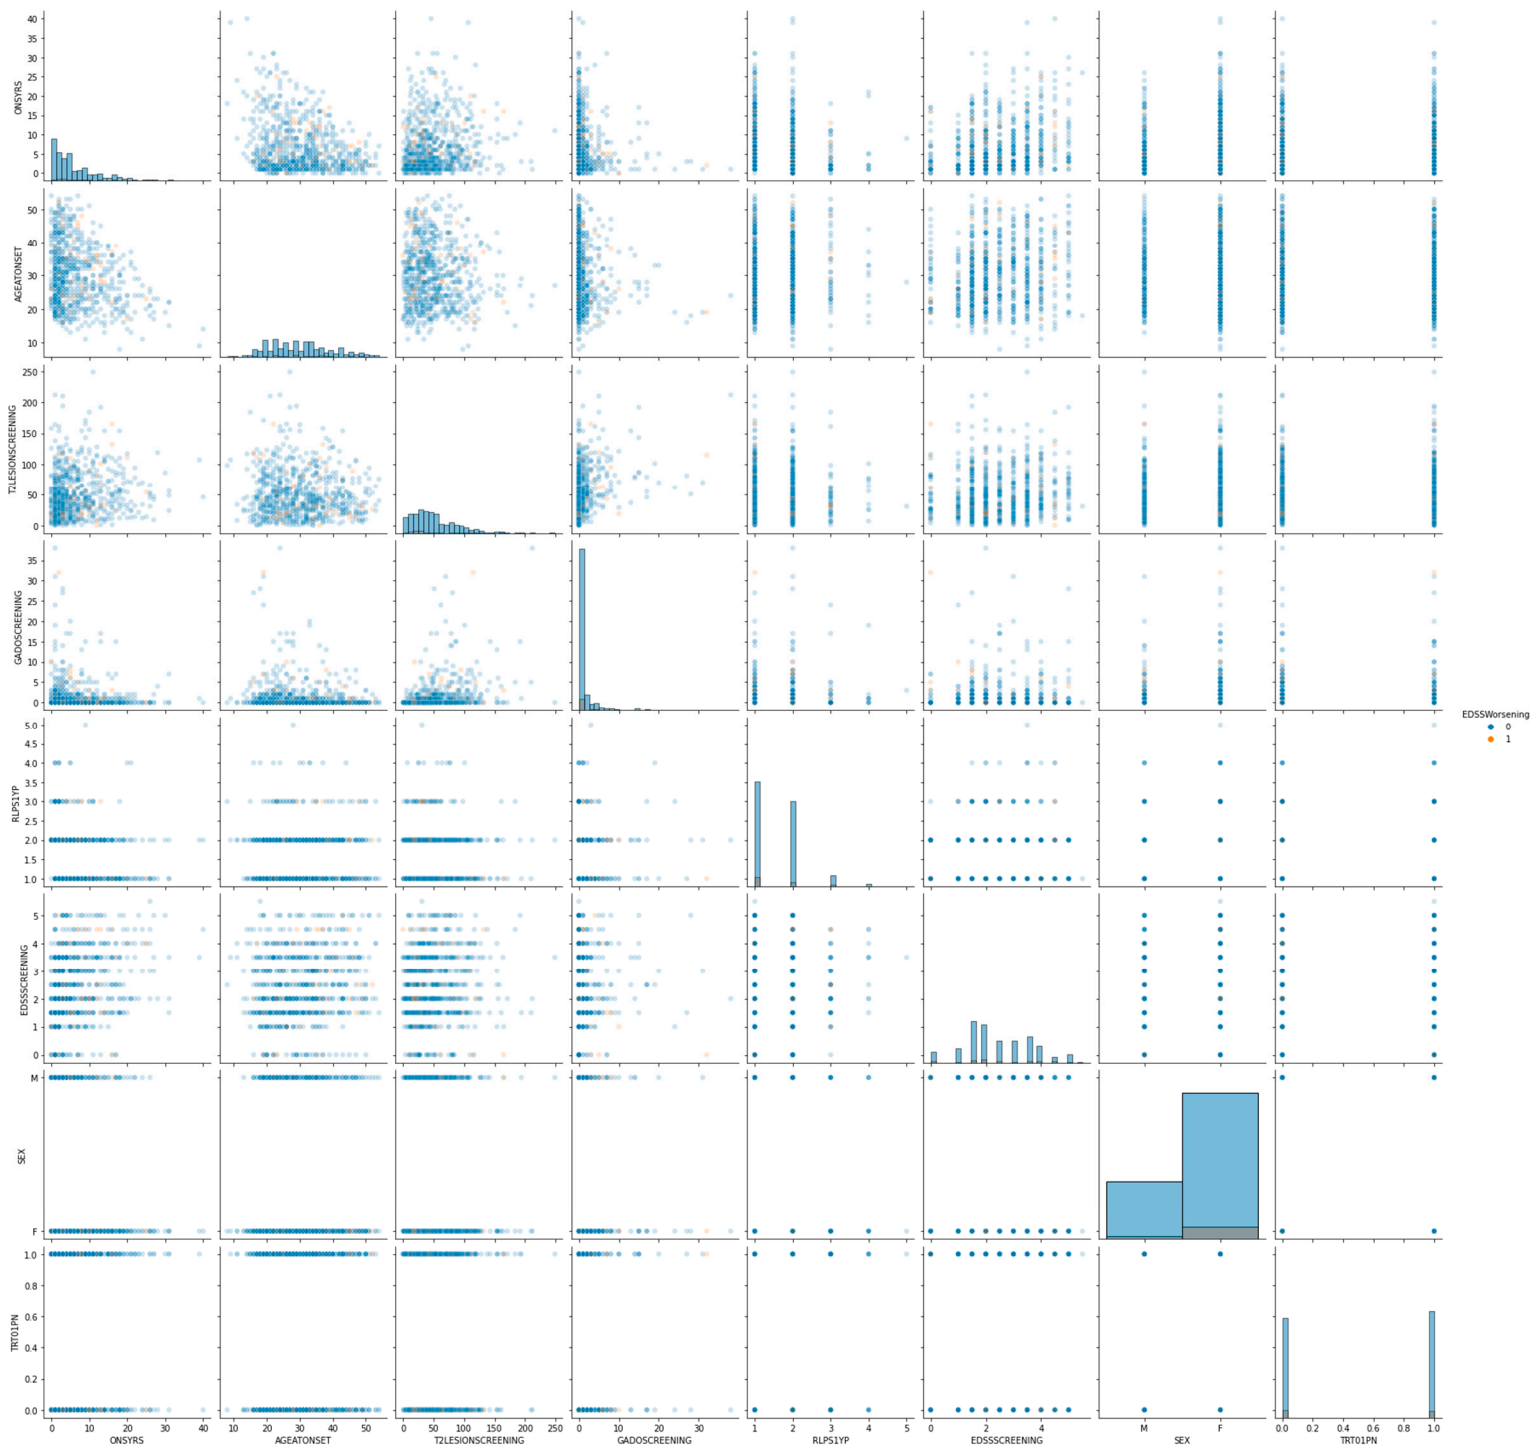

**Figure S1**, Pairwise graph showing how the features used by the physician differ by EDSS worsening. The diagonal shows the distribution of individual variables for each EDSS worsening class

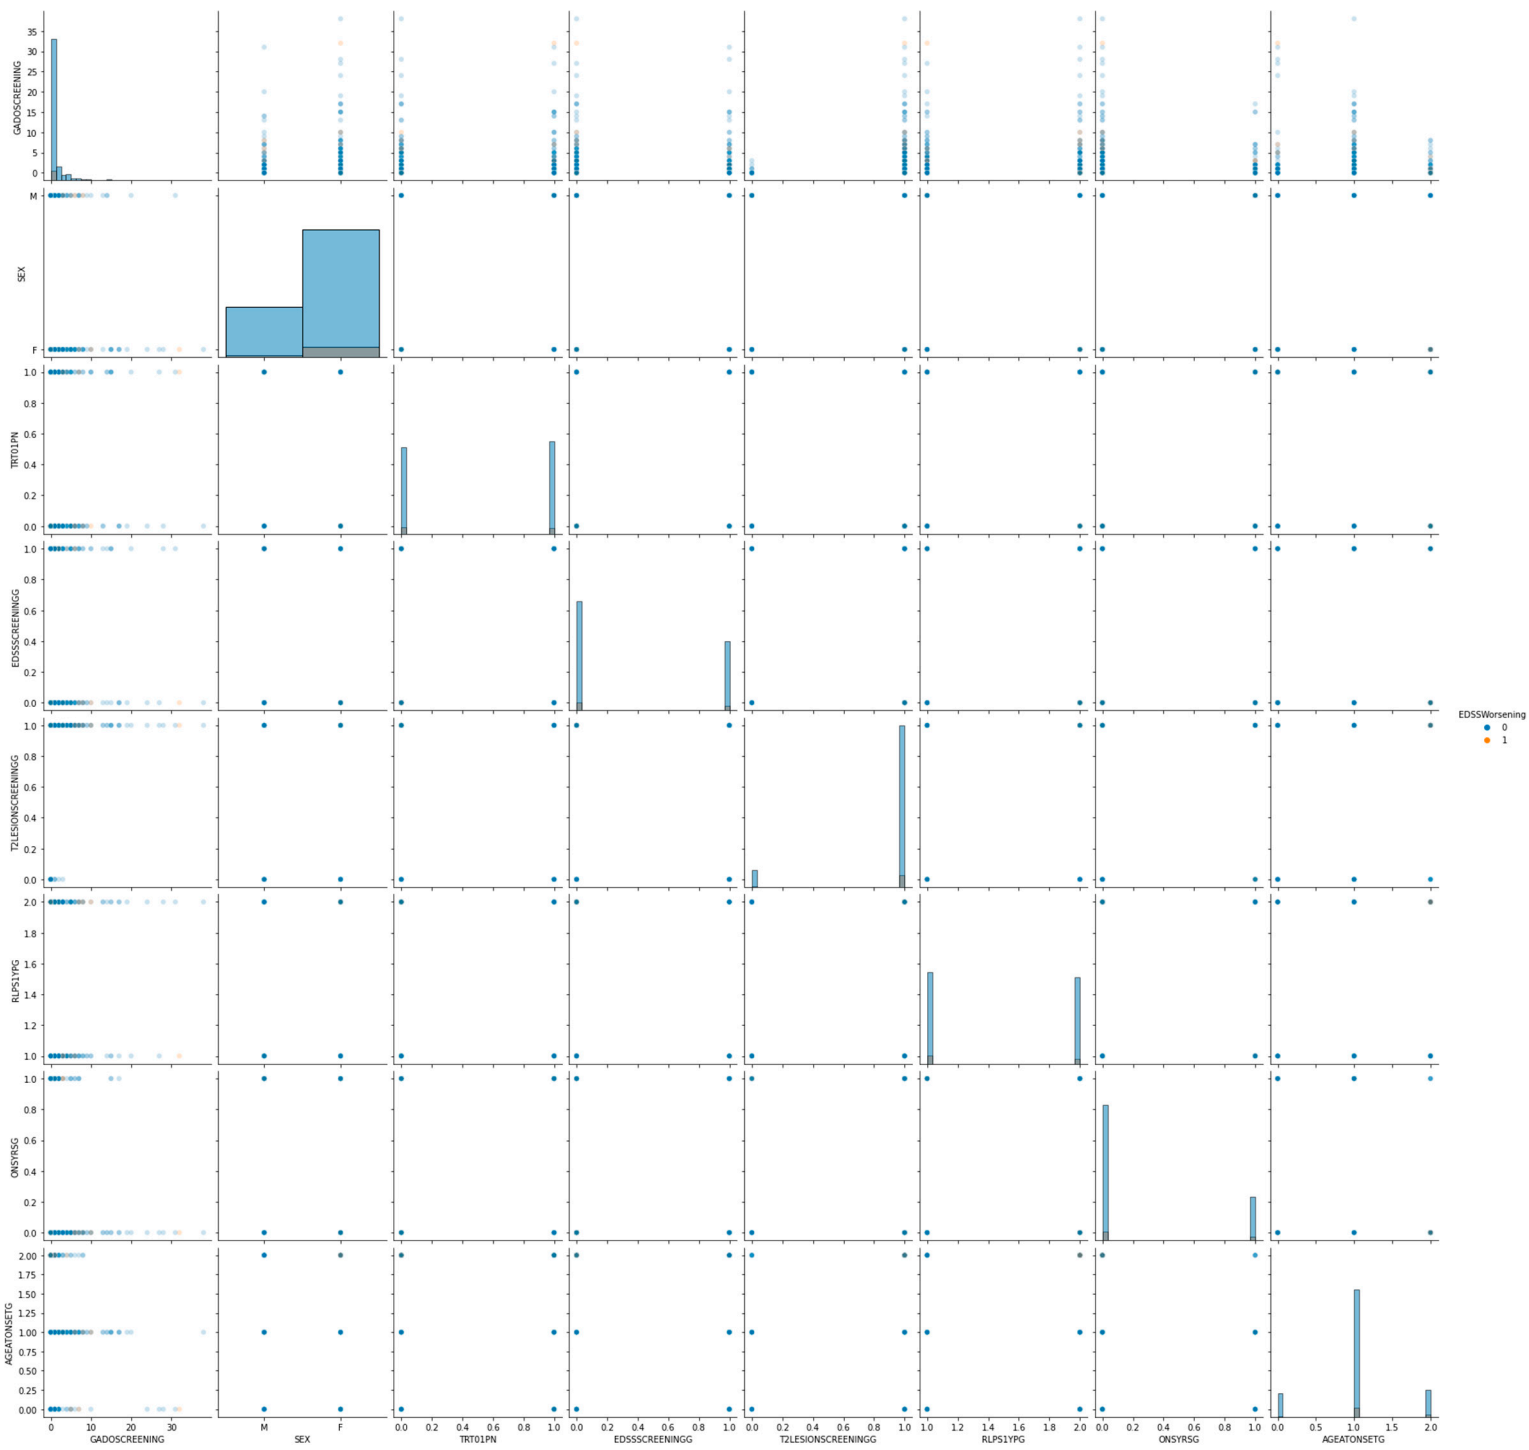

**Figure S2**, Pairwise graph showing how the features used and categorized by the physician differ by EDSS worsening. The diagonal shows the distribution of individual variables for each EDSS worsening class

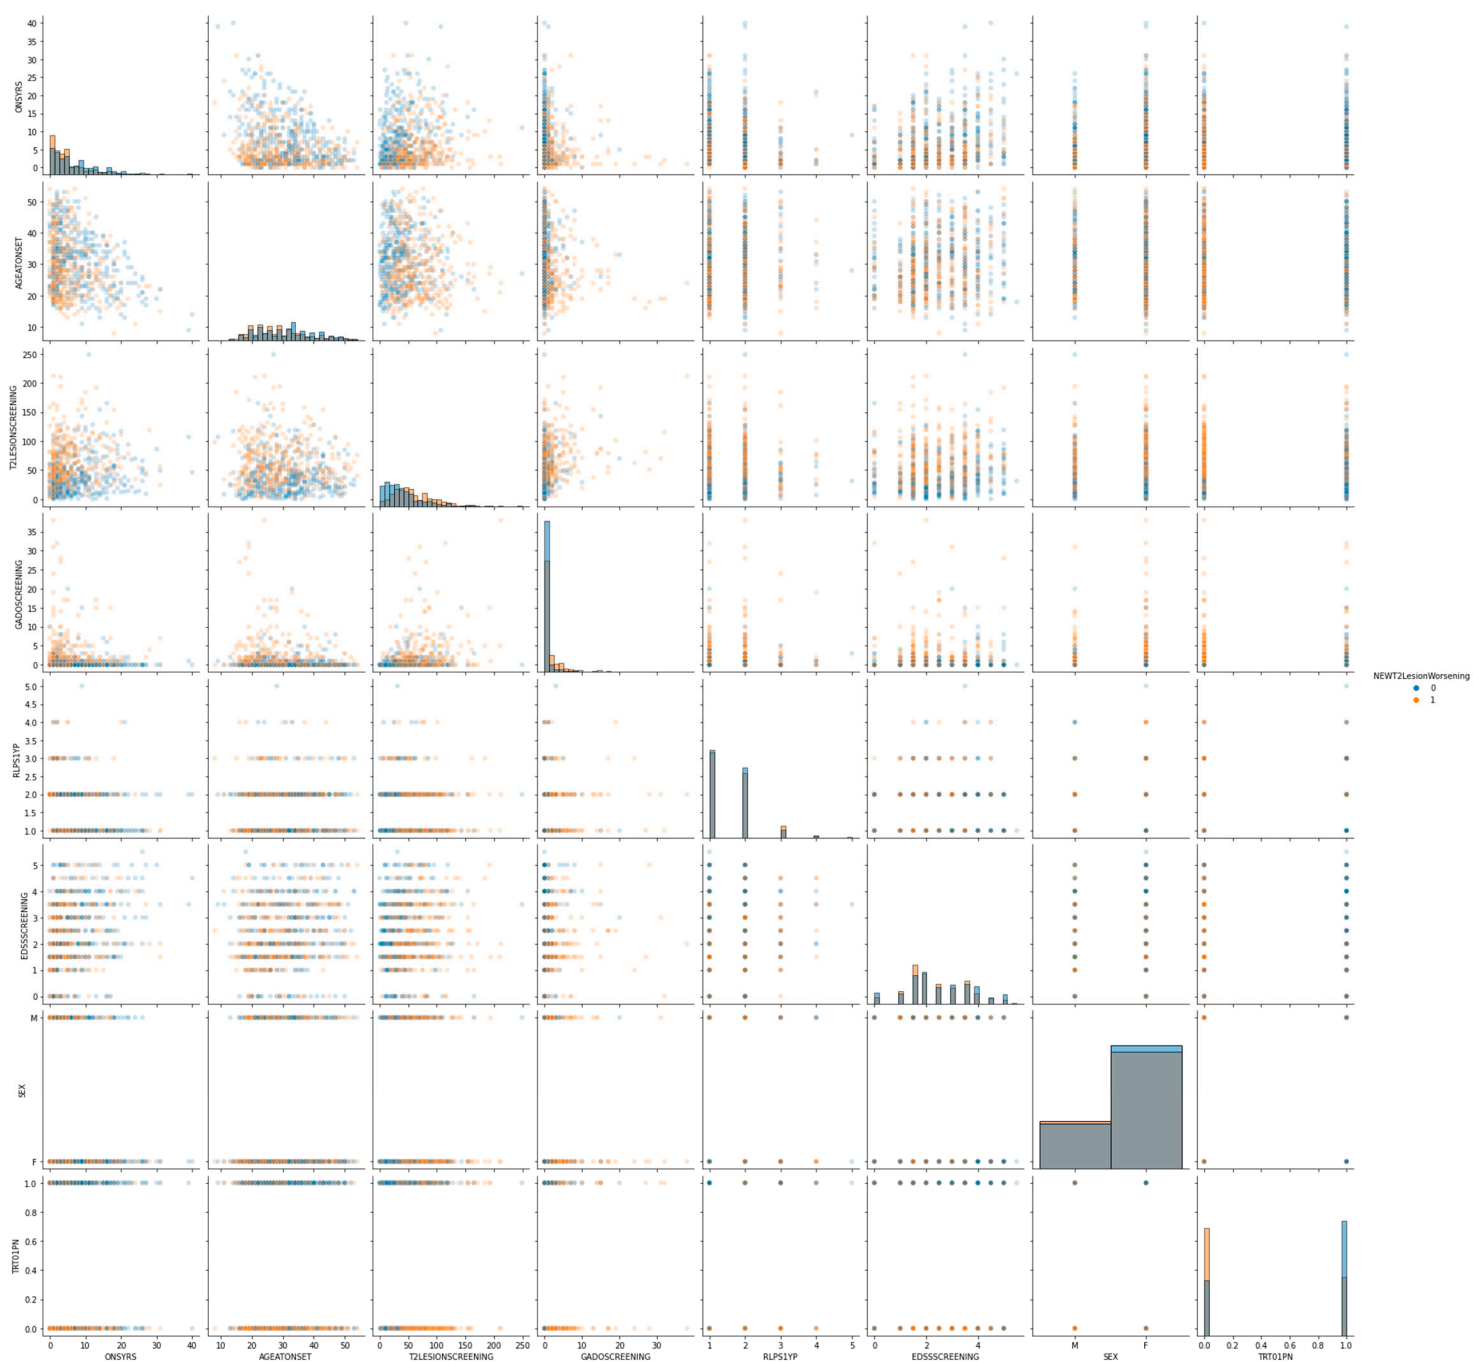

**Figure S3.** Pairwise graph showing how the features used by the physician differ by Lesion worsening. The diagonal shows the distribution of individual variables for each Lesion worsening class

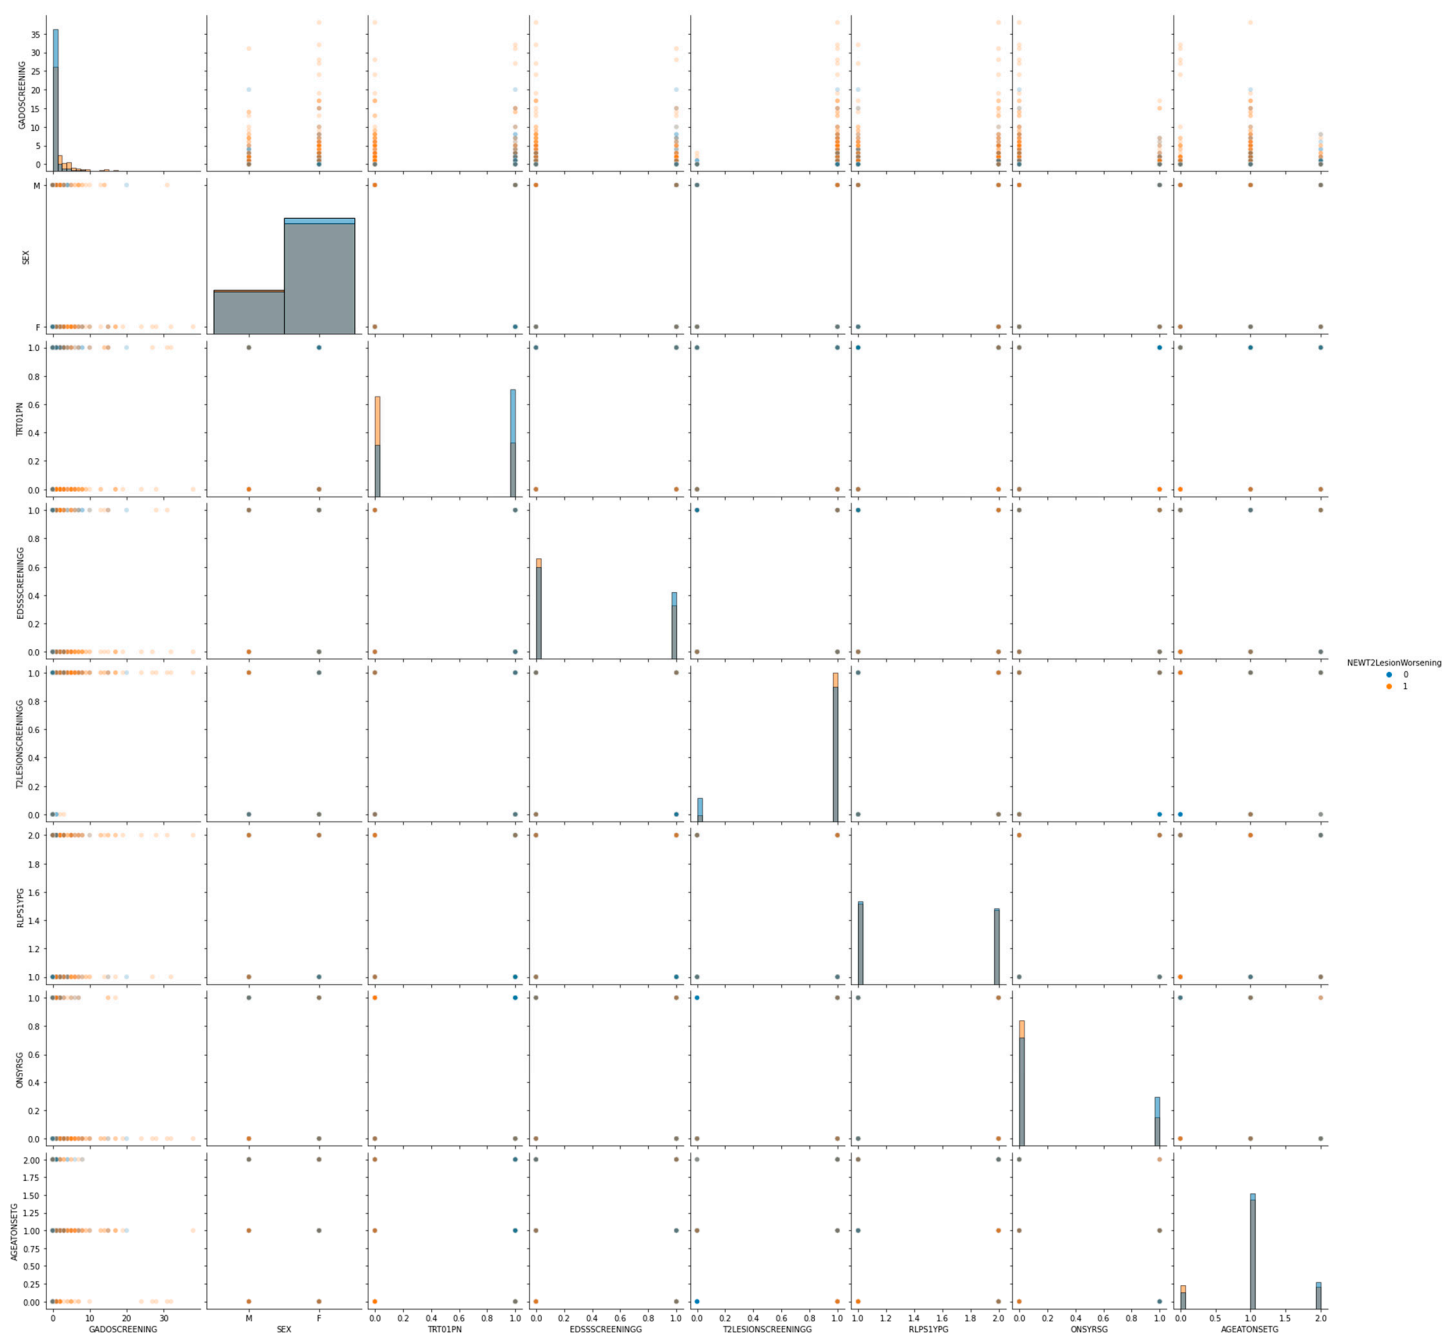

**Figure S4**, Pairwise graph showing how the features used and categorized by the physician differ by Lesion worsening. The diagonal shows the distribution of individual variables for each Lesion worsening class



*Table S2, Performance of models created by the 'All features' method for EDSS worsening prediction*

|                                       | AUC score |       |       |       | F1 score |       |       |       | True positive |       |       |        | True negative |     |      |       | False positive |      |      |       | False negative |      |      |        |
|---------------------------------------|-----------|-------|-------|-------|----------|-------|-------|-------|---------------|-------|-------|--------|---------------|-----|------|-------|----------------|------|------|-------|----------------|------|------|--------|
|                                       | max       | min   | mean  | std   | max      | min   | mean  | std   | max           | min   | mean  | std    | max           | min | mean | std   | max            | min  | mean | std   | max            | min  | mean | std    |
| LogisticRegression                    | 0.635     | 0.462 | 0.548 | 0.060 | 0.737    | 0.698 | 0.715 | 0.014 | 96.0          | 89.0  | 91.6  | 2.417  | 7.0           | 3.0 | 4.8  | 1.327 | 7.0            | 4.0  | 5.4  | 1.020 | 57.0           | 50.0 | 54.0 | 2.366  |
| DecisionTreeClassifier                | 0.548     | 0.418 | 0.473 | 0.043 | 0.777    | 0.582 | 0.677 | 0.069 | 108.0         | 67.0  | 86.2  | 14.932 | 6.0           | 2.0 | 3.6  | 1.625 | 8.0            | 4.0  | 6.6  | 1.744 | 79.0           | 38.0 | 59.4 | 14.814 |
| BaggingClassifier_LogisticRegression  | 0.628     | 0.460 | 0.532 | 0.061 | 0.792    | 0.751 | 0.767 | 0.014 | 109.0         | 101.0 | 104.0 | 2.828  | 6.0           | 2.0 | 3.6  | 1.356 | 8.0            | 5.0  | 6.6  | 1.020 | 45.0           | 37.0 | 41.6 | 2.653  |
| BaggingClassifier_DecisionTree        | 0.592     | 0.429 | 0.491 | 0.055 | 0.830    | 0.755 | 0.783 | 0.025 | 119.0         | 102.0 | 109.2 | 5.636  | 4.0           | 1.0 | 2.4  | 1.020 | 9.0            | 7.0  | 7.8  | 0.748 | 44.0           | 26.0 | 36.4 | 6.020  |
| AdaBoostClassifier_DecisionTree       | 0.513     | 0.429 | 0.472 | 0.030 | 0.810    | 0.755 | 0.780 | 0.018 | 116.0         | 104.0 | 109.0 | 4.099  | 3.0           | 1.0 | 2.0  | 0.632 | 9.0            | 7.0  | 8.2  | 0.748 | 41.0           | 30.0 | 36.6 | 3.929  |
| RandomForestClassifier                | 0.600     | 0.462 | 0.536 | 0.048 | 0.783    | 0.700 | 0.732 | 0.036 | 107.0         | 87.0  | 96.0  | 8.295  | 6.0           | 3.0 | 4.2  | 0.980 | 7.0            | 4.0  | 6.0  | 1.095 | 58.0           | 39.0 | 49.6 | 8.309  |
| GradientBoostingClassifier            | 0.500     | 0.486 | 0.496 | 0.005 | 0.905    | 0.883 | 0.899 | 0.008 | 146.0         | 141.0 | 144.4 | 1.744  | 0.0           | 0.0 | 0.0  | 0.000 | 11.0           | 10.0 | 10.2 | 0.400 | 4.0            | 0.0  | 1.2  | 1.470  |
| XGBoostClassifier                     | 0.637     | 0.427 | 0.523 | 0.067 | 0.815    | 0.769 | 0.788 | 0.016 | 113.0         | 105.0 | 109.4 | 2.728  | 5.0           | 1.0 | 3.0  | 1.265 | 9.0            | 5.0  | 7.2  | 1.327 | 41.0           | 33.0 | 36.2 | 2.786  |
| SVCClassifier                         | 0.672     | 0.434 | 0.559 | 0.081 | 0.728    | 0.631 | 0.671 | 0.031 | 94.0          | 74.0  | 82.6  | 6.591  | 8.0           | 3.0 | 5.6  | 1.744 | 7.0            | 2.0  | 4.6  | 1.855 | 72.0           | 52.0 | 63.0 | 6.512  |
| BaggingClassifier_SVC                 | 0.500     | 0.500 | 0.500 | 0.000 | 0.905    | 0.896 | 0.903 | 0.004 | 146.0         | 145.0 | 145.6 | 0.490  | 0.0           | 0.0 | 0.0  | 0.000 | 11.0           | 10.0 | 10.2 | 0.400 | 0.0            | 0.0  | 0.0  | 0.000  |
| AdaBoostClassifier_LogisticRegression | 0.615     | 0.464 | 0.555 | 0.054 | 0.731    | 0.636 | 0.709 | 0.037 | 95.0          | 77.0  | 90.4  | 6.771  | 6.0           | 4.0 | 5.0  | 0.894 | 6.0            | 4.0  | 5.2  | 0.748 | 69.0           | 50.0 | 55.2 | 7.026  |
| AdaBoostClassifier_SVC                | 0.500     | 0.500 | 0.500 | 0.000 | 0.905    | 0.896 | 0.903 | 0.004 | 146.0         | 145.0 | 145.6 | 0.490  | 0.0           | 0.0 | 0.0  | 0.000 | 11.0           | 10.0 | 10.2 | 0.400 | 0.0            | 0.0  | 0.0  | 0.000  |

*Table S3, Performance of models created by the 'Physician features' method for EDSS worsening prediction*

|                                       | AUC score |       |       |       | F1 score |       |       |       | True positive |       |       |       | True negative |     |      |       | False positive |      |      |       | False negative |      |      |       |
|---------------------------------------|-----------|-------|-------|-------|----------|-------|-------|-------|---------------|-------|-------|-------|---------------|-----|------|-------|----------------|------|------|-------|----------------|------|------|-------|
|                                       | max       | min   | mean  | std   | max      | min   | mean  | std   | max           | min   | mean  | std   | max           | min | mean | std   | max            | min  | mean | std   | max            | min  | mean | std   |
| LogisticRegression                    | 0.601     | 0.401 | 0.509 | 0.080 | 0.767    | 0.743 | 0.756 | 0.010 | 104.0         | 98.0  | 101.0 | 1.897 | 5.0           | 1.0 | 3.2  | 1.600 | 9.0            | 5.0  | 7.0  | 1.789 | 46.0           | 39.0 | 42.8 | 2.227 |
| DecisionTreeClassifier                | 0.682     | 0.432 | 0.551 | 0.082 | 0.813    | 0.720 | 0.766 | 0.032 | 110.0         | 92.0  | 102.4 | 7.310 | 6.0           | 1.0 | 4.0  | 1.789 | 9.0            | 4.0  | 6.2  | 1.720 | 51.0           | 34.0 | 41.4 | 7.031 |
| BaggingClassifier_LogisticRegression  | 0.627     | 0.467 | 0.553 | 0.057 | 0.871    | 0.826 | 0.844 | 0.017 | 128.0         | 119.0 | 122.2 | 3.187 | 4.0           | 1.0 | 2.6  | 1.020 | 9.0            | 6.0  | 7.6  | 1.200 | 25.0           | 16.0 | 21.6 | 3.137 |
| BaggingClassifier_DecisionTree        | 0.685     | 0.432 | 0.552 | 0.084 | 0.817    | 0.720 | 0.767 | 0.034 | 111.0         | 92.0  | 102.6 | 7.526 | 6.0           | 1.0 | 4.0  | 1.789 | 9.0            | 4.0  | 6.2  | 1.720 | 51.0           | 33.0 | 41.2 | 7.250 |
| AdaBoostClassifier_DecisionTree       | 0.543     | 0.497 | 0.508 | 0.018 | 0.910    | 0.891 | 0.902 | 0.006 | 144.0         | 142.0 | 143.2 | 0.980 | 1.0           | 0.0 | 0.2  | 0.400 | 11.0           | 9.0  | 10.0 | 0.632 | 2.0            | 0.0  | 0.6  | 0.800 |
| RandomForestClassifier                | 0.572     | 0.474 | 0.521 | 0.035 | 0.834    | 0.789 | 0.817 | 0.017 | 122.0         | 107.0 | 116.0 | 5.254 | 4.0           | 1.0 | 2.4  | 1.020 | 9.0            | 6.0  | 7.8  | 0.980 | 37.0           | 22.0 | 27.8 | 5.307 |
| GradientBoostingClassifier            | 0.551     | 0.448 | 0.503 | 0.034 | 0.879    | 0.852 | 0.865 | 0.010 | 134.0         | 128.0 | 130.6 | 2.154 | 2.0           | 0.0 | 1.0  | 0.632 | 10.0           | 8.0  | 9.2  | 0.748 | 16.0           | 10.0 | 13.2 | 2.315 |
| XGBoostClassifier                     | 0.646     | 0.449 | 0.549 | 0.073 | 0.825    | 0.790 | 0.808 | 0.011 | 115.0         | 106.0 | 112.8 | 3.429 | 5.0           | 1.0 | 3.2  | 1.600 | 9.0            | 5.0  | 7.0  | 1.673 | 38.0           | 29.0 | 31.0 | 3.521 |
| SVCClassifier                         | 0.614     | 0.495 | 0.533 | 0.048 | 0.689    | 0.611 | 0.662 | 0.029 | 86.0          | 71.0  | 80.2  | 5.776 | 7.0           | 4.0 | 5.2  | 1.166 | 6.0            | 3.0  | 5.0  | 1.095 | 73.0           | 58.0 | 63.6 | 5.886 |
| BaggingClassifier_SVC                 | 0.500     | 0.500 | 0.500 | 0.000 | 0.904    | 0.894 | 0.902 | 0.004 | 144.0         | 143.0 | 143.8 | 0.400 | 0.0           | 0.0 | 0.0  | 0.000 | 11.0           | 10.0 | 10.2 | 0.400 | 0.0            | 0.0  | 0.0  | 0.000 |
| AdaBoostClassifier_LogisticRegression | 0.637     | 0.490 | 0.530 | 0.055 | 0.766    | 0.724 | 0.748 | 0.014 | 103.0         | 93.0  | 98.6  | 3.611 | 6.0           | 3.0 | 3.8  | 1.166 | 8.0            | 4.0  | 6.4  | 1.356 | 51.0           | 41.0 | 45.2 | 3.816 |
| AdaBoostClassifier_SVC                | 0.500     | 0.500 | 0.500 | 0.000 | 0.904    | 0.894 | 0.902 | 0.004 | 144.0         | 143.0 | 143.8 | 0.400 | 0.0           | 0.0 | 0.0  | 0.000 | 11.0           | 10.0 | 10.2 | 0.400 | 0.0            | 0.0  | 0.0  | 0.000 |

*Table S4, Performance of models created by the 'Physician features & classes' method for EDSS worsening prediction*

|                                       | AUC score |       |       |       | F1 score |       |       |       | True positive |       |       |        | True negative |     |      |       | False positive |      |      |       | False negative |      |      |        |
|---------------------------------------|-----------|-------|-------|-------|----------|-------|-------|-------|---------------|-------|-------|--------|---------------|-----|------|-------|----------------|------|------|-------|----------------|------|------|--------|
|                                       | max       | min   | mean  | std   | max      | min   | mean  | std   | max           | min   | mean  | std    | max           | min | mean | std   | max            | min  | mean | std   | max            | min  | mean | std    |
| LogisticRegression                    | 0.615     | 0.491 | 0.561 | 0.049 | 0.711    | 0.626 | 0.679 | 0.028 | 91.0          | 73.0  | 84.0  | 5.933  | 8.0           | 4.0 | 5.6  | 1.497 | 6.0            | 3.0  | 4.6  | 1.200 | 72.0           | 54.0 | 61.6 | 5.817  |
| DecisionTreeClassifier                | 0.625     | 0.443 | 0.549 | 0.063 | 0.743    | 0.608 | 0.683 | 0.051 | 98.0          | 70.0  | 85.4  | 10.288 | 7.0           | 3.0 | 5.2  | 1.327 | 7.0            | 3.0  | 5.0  | 1.414 | 76.0           | 47.0 | 60.2 | 10.534 |
| BaggingClassifier_LogisticRegression  | 0.615     | 0.491 | 0.561 | 0.049 | 0.711    | 0.626 | 0.679 | 0.028 | 91.0          | 73.0  | 84.0  | 5.933  | 8.0           | 4.0 | 5.6  | 1.497 | 6.0            | 3.0  | 4.6  | 1.200 | 72.0           | 54.0 | 61.6 | 5.817  |
| BaggingClassifier_DecisionTree        | 0.625     | 0.443 | 0.549 | 0.063 | 0.743    | 0.614 | 0.684 | 0.050 | 98.0          | 71.0  | 85.6  | 9.992  | 7.0           | 3.0 | 5.2  | 1.327 | 7.0            | 3.0  | 5.0  | 1.414 | 75.0           | 47.0 | 60.0 | 10.237 |
| AdaBoostClassifier_DecisionTree       | 0.577     | 0.416 | 0.512 | 0.066 | 0.805    | 0.751 | 0.774 | 0.022 | 113.0         | 100.0 | 106.4 | 4.673  | 4.0           | 1.0 | 3.0  | 1.265 | 9.0            | 6.0  | 7.2  | 1.166 | 46.0           | 32.0 | 39.2 | 4.956  |
| RandomForestClassifier                | 0.660     | 0.429 | 0.523 | 0.080 | 0.811    | 0.742 | 0.776 | 0.024 | 116.0         | 98.0  | 106.6 | 6.053  | 6.0           | 1.0 | 3.2  | 1.720 | 9.0            | 4.0  | 7.0  | 1.789 | 48.0           | 29.0 | 39.0 | 6.481  |
| GradientBoostingClassifier            | 0.529     | 0.483 | 0.498 | 0.017 | 0.898    | 0.888 | 0.893 | 0.004 | 145.0         | 140.0 | 142.0 | 2.098  | 1.0           | 0.0 | 0.2  | 0.400 | 11.0           | 9.0  | 10.0 | 0.632 | 6.0            | 0.0  | 3.6  | 2.245  |
| XGBoostClassifier                     | 0.527     | 0.471 | 0.504 | 0.022 | 0.740    | 0.646 | 0.688 | 0.036 | 98.0          | 79.0  | 87.0  | 7.403  | 5.0           | 3.0 | 4.2  | 0.748 | 7.0            | 5.0  | 6.0  | 0.632 | 67.0           | 47.0 | 58.6 | 7.710  |
| SVCClassifier                         | 0.692     | 0.539 | 0.598 | 0.055 | 0.767    | 0.708 | 0.745 | 0.022 | 102.0         | 90.0  | 97.2  | 4.261  | 7.0           | 4.0 | 5.4  | 1.020 | 6.0            | 3.0  | 4.8  | 0.980 | 56.0           | 43.0 | 48.4 | 4.409  |
| BaggingClassifier_SVC                 | 0.500     | 0.500 | 0.500 | 0.000 | 0.905    | 0.896 | 0.903 | 0.004 | 146.0         | 145.0 | 145.6 | 0.490  | 0.0           | 0.0 | 0.0  | 0.000 | 11.0           | 10.0 | 10.2 | 0.400 | 0.0            | 0.0  | 0.0  | 0.000  |
| AdaBoostClassifier_LogisticRegression | 0.622     | 0.503 | 0.550 | 0.045 | 0.732    | 0.639 | 0.690 | 0.032 | 94.0          | 76.0  | 86.4  | 6.344  | 7.0           | 4.0 | 5.2  | 1.166 | 6.0            | 4.0  | 5.0  | 0.894 | 69.0           | 52.0 | 59.2 | 6.079  |
| AdaBoostClassifier_SVC                | 0.500     | 0.500 | 0.500 | 0.000 | 0.905    | 0.896 | 0.903 | 0.004 | 146.0         | 145.0 | 145.6 | 0.490  | 0.0           | 0.0 | 0.0  | 0.000 | 11.0           | 10.0 | 10.2 | 0.400 | 0.0            | 0.0  | 0.0  | 0.000  |

*Table S5, Performance of models created by the 'All features' method for Lesion worsening prediction*

|                                       | AUC score |       |       |       | F1 score |       |       |       | True positive |      |      |       | True negative |      |      |       | False positive |      |      |       | False negative |      |      |       |
|---------------------------------------|-----------|-------|-------|-------|----------|-------|-------|-------|---------------|------|------|-------|---------------|------|------|-------|----------------|------|------|-------|----------------|------|------|-------|
|                                       | max       | min   | mean  | std   | max      | min   | mean  | std   | max           | min  | mean | std   | max           | min  | mean | std   | max            | min  | mean | std   | max            | min  | mean | std   |
| LogisticRegression                    | 0.746     | 0.662 | 0.701 | 0.035 | 0.746    | 0.662 | 0.701 | 0.035 | 61.0          | 48.0 | 54.2 | 4.707 | 55.0          | 51.0 | 53.8 | 1.470 | 25.0           | 21.0 | 22.2 | 1.470 | 30.0           | 17.0 | 23.8 | 4.707 |
| DecisionTreeClassifier                | 0.752     | 0.591 | 0.687 | 0.058 | 0.751    | 0.591 | 0.686 | 0.058 | 65.0          | 47.0 | 54.0 | 6.573 | 61.0          | 44.0 | 51.8 | 5.636 | 32.0           | 15.0 | 24.2 | 5.636 | 31.0           | 13.0 | 24.0 | 6.573 |
| BaggingClassifier_LogisticRegression  | 0.746     | 0.669 | 0.704 | 0.033 | 0.746    | 0.668 | 0.704 | 0.033 | 61.0          | 49.0 | 54.8 | 4.490 | 55.0          | 51.0 | 53.6 | 1.356 | 25.0           | 21.0 | 22.4 | 1.356 | 29.0           | 17.0 | 23.2 | 4.490 |
| BaggingClassifier_DecisionTree        | 0.753     | 0.642 | 0.698 | 0.044 | 0.753    | 0.641 | 0.698 | 0.044 | 62.0          | 56.0 | 58.4 | 2.245 | 56.0          | 43.0 | 49.2 | 4.665 | 33.0           | 20.0 | 26.8 | 4.665 | 22.0           | 16.0 | 19.6 | 2.245 |
| AdaBoostClassifier_DecisionTree       | 0.773     | 0.648 | 0.714 | 0.050 | 0.773    | 0.647 | 0.713 | 0.051 | 60.0          | 56.0 | 58.4 | 1.625 | 59.0          | 43.0 | 51.6 | 6.437 | 33.0           | 17.0 | 24.4 | 6.437 | 22.0           | 18.0 | 19.6 | 1.625 |
| RandomForestClassifier                | 0.740     | 0.655 | 0.712 | 0.033 | 0.740    | 0.655 | 0.712 | 0.033 | 59.0          | 54.0 | 56.6 | 1.855 | 57.0          | 47.0 | 53.0 | 3.406 | 29.0           | 19.0 | 23.0 | 3.406 | 24.0           | 19.0 | 21.4 | 1.855 |
| GradientBoostingClassifier            | 0.760     | 0.656 | 0.709 | 0.042 | 0.760    | 0.656 | 0.709 | 0.042 | 60.0          | 50.0 | 56.2 | 3.544 | 57.0          | 47.0 | 53.0 | 3.795 | 29.0           | 19.0 | 23.0 | 3.795 | 28.0           | 18.0 | 21.8 | 3.544 |
| XGBoostClassifier                     | 0.779     | 0.656 | 0.723 | 0.051 | 0.779    | 0.656 | 0.723 | 0.051 | 61.0          | 51.0 | 57.0 | 4.147 | 59.0          | 48.0 | 54.4 | 3.929 | 28.0           | 17.0 | 21.6 | 3.929 | 27.0           | 17.0 | 21.0 | 4.147 |
| SVCClassifier                         | 0.753     | 0.649 | 0.713 | 0.034 | 0.753    | 0.649 | 0.713 | 0.034 | 60.0          | 51.0 | 55.8 | 3.059 | 56.0          | 49.0 | 54.0 | 2.608 | 27.0           | 20.0 | 22.0 | 2.608 | 27.0           | 18.0 | 22.2 | 3.059 |
| BaggingClassifier_SVC                 | 0.766     | 0.675 | 0.722 | 0.036 | 0.766    | 0.675 | 0.722 | 0.036 | 62.0          | 52.0 | 57.4 | 4.128 | 56.0          | 52.0 | 53.8 | 1.600 | 24.0           | 20.0 | 22.2 | 1.600 | 26.0           | 16.0 | 20.6 | 4.128 |
| AdaBoostClassifier_LogisticRegression | 0.766     | 0.642 | 0.708 | 0.047 | 0.766    | 0.642 | 0.707 | 0.047 | 61.0          | 50.0 | 56.6 | 4.224 | 57.0          | 45.0 | 52.4 | 4.454 | 31.0           | 19.0 | 23.6 | 4.454 | 28.0           | 17.0 | 21.4 | 4.224 |
| AdaBoostClassifier_SVC                | 0.760     | 0.643 | 0.714 | 0.051 | 0.760    | 0.643 | 0.714 | 0.051 | 61.0          | 48.0 | 55.0 | 5.404 | 58.0          | 51.0 | 55.0 | 2.757 | 25.0           | 18.0 | 21.0 | 2.757 | 30.0           | 17.0 | 23.0 | 5.404 |

*Table S6, Performance of models created by the 'Physician features' method for Lesion worsening prediction*

|                                       | AUC score |       |       |       | F1 score |       |       |       | True positive |      |      |       | True negative |      |      |       | False positive |      |      |       | False negative |      |      |       |
|---------------------------------------|-----------|-------|-------|-------|----------|-------|-------|-------|---------------|------|------|-------|---------------|------|------|-------|----------------|------|------|-------|----------------|------|------|-------|
|                                       | max       | min   | mean  | std   | max      | min   | mean  | std   | max           | min  | mean | std   | max           | min  | mean | std   | max            | min  | mean | std   | max            | min  | mean | std   |
| LogisticRegression                    | 0.761     | 0.699 | 0.729 | 0.026 | 0.761    | 0.699 | 0.729 | 0.026 | 61.0          | 54.0 | 57.8 | 2.561 | 60.0          | 52.0 | 55.8 | 2.993 | 25.0           | 17.0 | 21.2 | 2.993 | 25.0           | 18.0 | 21.0 | 2.757 |
| DecisionTreeClassifier                | 0.738     | 0.635 | 0.701 | 0.038 | 0.737    | 0.634 | 0.700 | 0.039 | 63.0          | 46.0 | 54.6 | 7.003 | 60.0          | 51.0 | 54.6 | 4.030 | 26.0           | 17.0 | 22.4 | 4.030 | 33.0           | 16.0 | 24.2 | 7.194 |
| BaggingClassifier_LogisticRegression  | 0.763     | 0.686 | 0.724 | 0.030 | 0.763    | 0.686 | 0.724 | 0.030 | 61.0          | 53.0 | 57.6 | 2.800 | 60.0          | 51.0 | 55.2 | 3.655 | 26.0           | 17.0 | 21.8 | 3.655 | 26.0           | 18.0 | 21.2 | 2.926 |
| BaggingClassifier_DecisionTree        | 0.768     | 0.659 | 0.708 | 0.040 | 0.768    | 0.657 | 0.708 | 0.041 | 61.0          | 55.0 | 58.8 | 2.135 | 59.0          | 43.0 | 51.6 | 5.783 | 34.0           | 18.0 | 25.4 | 5.783 | 24.0           | 18.0 | 20.0 | 2.280 |
| AdaBoostClassifier_DecisionTree       | 0.750     | 0.666 | 0.706 | 0.032 | 0.750    | 0.666 | 0.705 | 0.032 | 64.0          | 54.0 | 58.4 | 3.611 | 56.0          | 48.0 | 51.6 | 2.728 | 29.0           | 21.0 | 25.4 | 2.728 | 25.0           | 15.0 | 20.4 | 3.555 |
| RandomForestClassifier                | 0.743     | 0.659 | 0.707 | 0.039 | 0.743    | 0.658 | 0.706 | 0.039 | 65.0          | 57.0 | 59.8 | 2.993 | 58.0          | 44.0 | 50.4 | 5.314 | 33.0           | 19.0 | 26.6 | 5.314 | 22.0           | 14.0 | 19.0 | 2.828 |
| GradientBoostingClassifier            | 0.749     | 0.659 | 0.708 | 0.033 | 0.749    | 0.658 | 0.708 | 0.034 | 65.0          | 55.0 | 58.8 | 3.370 | 55.0          | 45.0 | 51.6 | 3.666 | 32.0           | 22.0 | 25.4 | 3.666 | 24.0           | 14.0 | 20.0 | 3.286 |
| XGBoostClassifier                     | 0.750     | 0.673 | 0.715 | 0.030 | 0.750    | 0.673 | 0.714 | 0.030 | 64.0          | 53.0 | 58.6 | 3.980 | 58.0          | 46.0 | 52.8 | 4.534 | 31.0           | 19.0 | 24.2 | 4.534 | 26.0           | 15.0 | 20.2 | 3.970 |
| SVCClassifier                         | 0.763     | 0.673 | 0.724 | 0.036 | 0.763    | 0.673 | 0.724 | 0.036 | 62.0          | 52.0 | 57.0 | 3.406 | 61.0          | 50.0 | 55.8 | 4.308 | 27.0           | 16.0 | 21.2 | 4.308 | 27.0           | 17.0 | 21.8 | 3.429 |
| BaggingClassifier_SVC                 | 0.757     | 0.685 | 0.724 | 0.029 | 0.756    | 0.685 | 0.724 | 0.029 | 62.0          | 54.0 | 58.0 | 2.608 | 60.0          | 50.0 | 54.8 | 3.868 | 27.0           | 17.0 | 22.2 | 3.868 | 25.0           | 17.0 | 20.8 | 2.713 |
| AdaBoostClassifier_LogisticRegression | 0.768     | 0.673 | 0.720 | 0.035 | 0.768    | 0.673 | 0.720 | 0.035 | 62.0          | 54.0 | 57.2 | 3.059 | 60.0          | 50.0 | 55.0 | 4.290 | 27.0           | 17.0 | 22.0 | 4.290 | 25.0           | 17.0 | 21.6 | 3.200 |
| AdaBoostClassifier_SVC                | 0.761     | 0.685 | 0.721 | 0.030 | 0.761    | 0.685 | 0.721 | 0.030 | 63.0          | 55.0 | 59.0 | 3.033 | 59.0          | 49.0 | 53.4 | 3.720 | 28.0           | 18.0 | 23.6 | 3.720 | 24.0           | 16.0 | 19.8 | 3.250 |

*Table S7, Performance of models created by the 'Physician features & classes' method for Lesion worsening prediction*

|                                       | AUC score |       |       |       | F1 score |       |       |       | True positive |      |      |       | True negative |      |      |       | False positive |      |      |       | False negative |      |      |       |
|---------------------------------------|-----------|-------|-------|-------|----------|-------|-------|-------|---------------|------|------|-------|---------------|------|------|-------|----------------|------|------|-------|----------------|------|------|-------|
|                                       | max       | min   | mean  | std   | max      | min   | mean  | std   | max           | min  | mean | std   | max           | min  | mean | std   | max            | min  | mean | std   | max            | min  | mean | std   |
| LogisticRegression                    | 0.730     | 0.634 | 0.692 | 0.036 | 0.730    | 0.633 | 0.691 | 0.036 | 62.0          | 54.0 | 57.4 | 3.382 | 54.0          | 44.0 | 50.4 | 3.441 | 33.0           | 23.0 | 26.6 | 3.441 | 25.0           | 17.0 | 21.4 | 3.611 |
| DecisionTreeClassifier                | 0.749     | 0.629 | 0.699 | 0.047 | 0.749    | 0.627 | 0.698 | 0.047 | 64.0          | 46.0 | 57.2 | 7.985 | 54.0          | 49.0 | 51.8 | 1.720 | 28.0           | 23.0 | 25.2 | 1.720 | 33.0           | 15.0 | 21.6 | 8.139 |
| BaggingClassifier_LogisticRegression  | 0.730     | 0.634 | 0.695 | 0.037 | 0.730    | 0.632 | 0.695 | 0.037 | 62.0          | 55.0 | 58.0 | 2.608 | 54.0          | 43.0 | 50.4 | 3.929 | 34.0           | 23.0 | 26.6 | 3.929 | 24.0           | 17.0 | 20.8 | 2.786 |
| BaggingClassifier_DecisionTree        | 0.749     | 0.640 | 0.707 | 0.045 | 0.749    | 0.640 | 0.707 | 0.045 | 63.0          | 53.0 | 58.6 | 3.878 | 55.0          | 45.0 | 51.6 | 3.555 | 32.0           | 22.0 | 25.4 | 3.555 | 26.0           | 16.0 | 20.2 | 4.020 |
| AdaBoostClassifier_DecisionTree       | 0.756     | 0.660 | 0.699 | 0.037 | 0.756    | 0.660 | 0.699 | 0.037 | 64.0          | 50.0 | 57.2 | 5.115 | 55.0          | 48.0 | 51.8 | 2.561 | 29.0           | 22.0 | 25.2 | 2.561 | 29.0           | 15.0 | 21.6 | 5.276 |
| RandomForestClassifier                | 0.774     | 0.679 | 0.725 | 0.035 | 0.774    | 0.679 | 0.725 | 0.035 | 62.0          | 56.0 | 59.6 | 2.939 | 58.0          | 50.0 | 53.4 | 2.653 | 27.0           | 19.0 | 23.6 | 2.653 | 23.0           | 16.0 | 19.2 | 3.124 |
| GradientBoostingClassifier            | 0.743     | 0.672 | 0.716 | 0.030 | 0.743    | 0.672 | 0.716 | 0.031 | 63.0          | 56.0 | 59.8 | 2.482 | 54.0          | 47.0 | 51.8 | 2.638 | 30.0           | 23.0 | 25.2 | 2.638 | 23.0           | 16.0 | 19.0 | 2.608 |
| XGBoostClassifier                     | 0.742     | 0.659 | 0.709 | 0.032 | 0.742    | 0.658 | 0.709 | 0.032 | 62.0          | 55.0 | 59.2 | 2.482 | 55.0          | 45.0 | 51.4 | 3.499 | 32.0           | 22.0 | 25.6 | 3.499 | 24.0           | 17.0 | 19.6 | 2.577 |
| SVCClassifier                         | 0.743     | 0.660 | 0.702 | 0.029 | 0.744    | 0.660 | 0.702 | 0.029 | 60.0          | 54.0 | 57.6 | 2.332 | 56.0          | 49.0 | 51.8 | 2.400 | 28.0           | 21.0 | 25.2 | 2.400 | 25.0           | 18.0 | 21.2 | 2.561 |
| BaggingClassifier_SVC                 | 0.744     | 0.685 | 0.707 | 0.022 | 0.744    | 0.685 | 0.707 | 0.022 | 60.0          | 57.0 | 58.4 | 1.020 | 57.0          | 49.0 | 51.8 | 2.786 | 28.0           | 20.0 | 25.2 | 2.786 | 22.0           | 18.0 | 20.4 | 1.356 |
| AdaBoostClassifier_LogisticRegression | 0.748     | 0.608 | 0.684 | 0.048 | 0.748    | 0.608 | 0.684 | 0.048 | 61.0          | 52.0 | 56.0 | 4.147 | 55.0          | 43.0 | 50.6 | 4.409 | 34.0           | 22.0 | 26.4 | 4.409 | 27.0           | 17.0 | 22.8 | 4.400 |
| AdaBoostClassifier_SVC                | 0.742     | 0.603 | 0.673 | 0.045 | 0.742    | 0.603 | 0.673 | 0.045 | 59.0          | 47.0 | 53.0 | 4.000 | 56.0          | 47.0 | 51.8 | 3.600 | 30.0           | 21.0 | 25.2 | 3.600 | 32.0           | 19.0 | 25.8 | 4.308 |
